# Supplementary material
Source: ML conference proceedings conference paper supplement (https://openaccess.thecvf.com/content/ICCV2023/html/Zhang_Multi-Event_Video-Text_Retrieval_ICCV_2023_paper.html)
Supplement: Supplementary file 1 [file Zhang_Multi-Event_Video-Text_Retrieval_ICCV_2023_supplemental.pdf]

# Multi-event Video-Text Retrieval Supplementary Materials

Gengyuan Zhang<sup>1,2</sup> Jisen Ren<sup>1</sup> Jindong Gu<sup>3</sup> Volker Tresp<sup>1,2</sup>

<sup>1</sup> LMU Munich, Munich, Germany

<sup>2</sup> Munich Center for Machine Learning, Munich, Germany

<sup>3</sup> University of Oxford, Oxford, United Kingdom

zhang@dbs.ifi.lmu.de jindong.gu@outlook.com

## 1. Continued Figures

We extend Fig.5-6 in the main paper with metrics on  $k = 10$  and  $k = 50$ . Similarly, we find that the dynamic weighting strategy is a good tradeoff between Video-to-Text and Text-to-Video tasks and manifests stability in different trials.

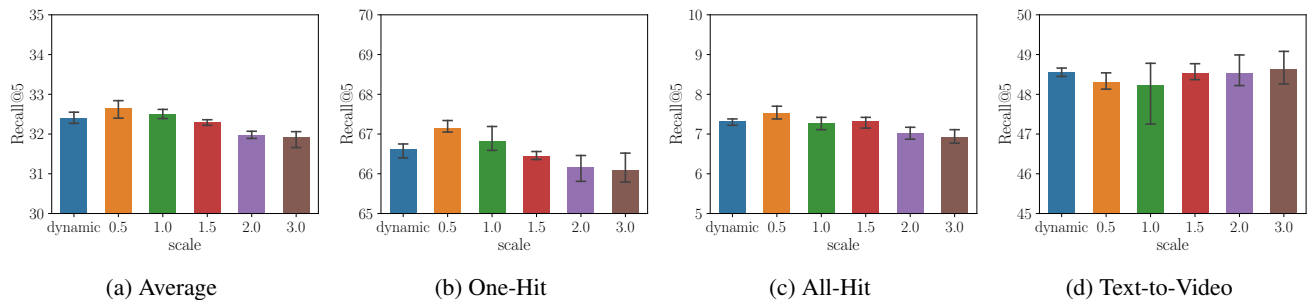

Figure 1: We compare the model performance with different weighting strategies in the MeVTR loss on  $Recall@10$  on the Video-to-Text task for ActivityNet Captions.

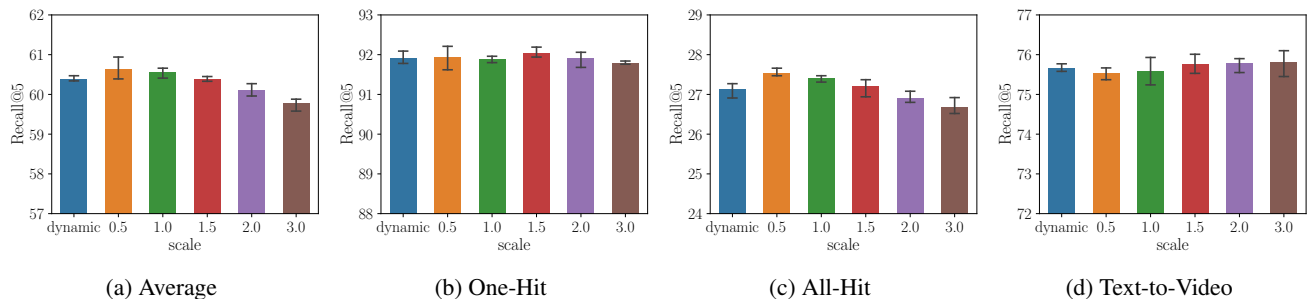

Figure 2: We compare the model performance with different weighting strategies in the MeVTR loss on  $Recall@50$  on the Video-to-Text task for ActivityNet Captions.
